# Supplementary material for: Association of Anthracycline With Heart Failure in Patients Treated for Breast Cancer or Lymphoma, 1985-2010
Source: PubMed Central journal article supplement (PMC9898820; doi:10.1001/jamanetworkopen.2022.54669), 2023-02-03
Supplement: jamanetwopen-e2254669-s002.pdf [file jamanetwopen-e2254669-s002.pdf]

## Data Sharing Statement

Larsen. Association of Anthracycline With Heart Failure in Patients Treated for Breast Cancer or Lymphoma, 1985-2010. *JAMA Netw Open*. Published February 03, 2023.  
doi:10.1001/jamanetworkopen.2022.54669

### Data

**Data available:** No
